# Supplementary material
Source: publisher figshare collection journal article supplement (https://acs.figshare.com/ndownloader/files/3959173)
Supplement: Supplementary file 1 [file 3959173]

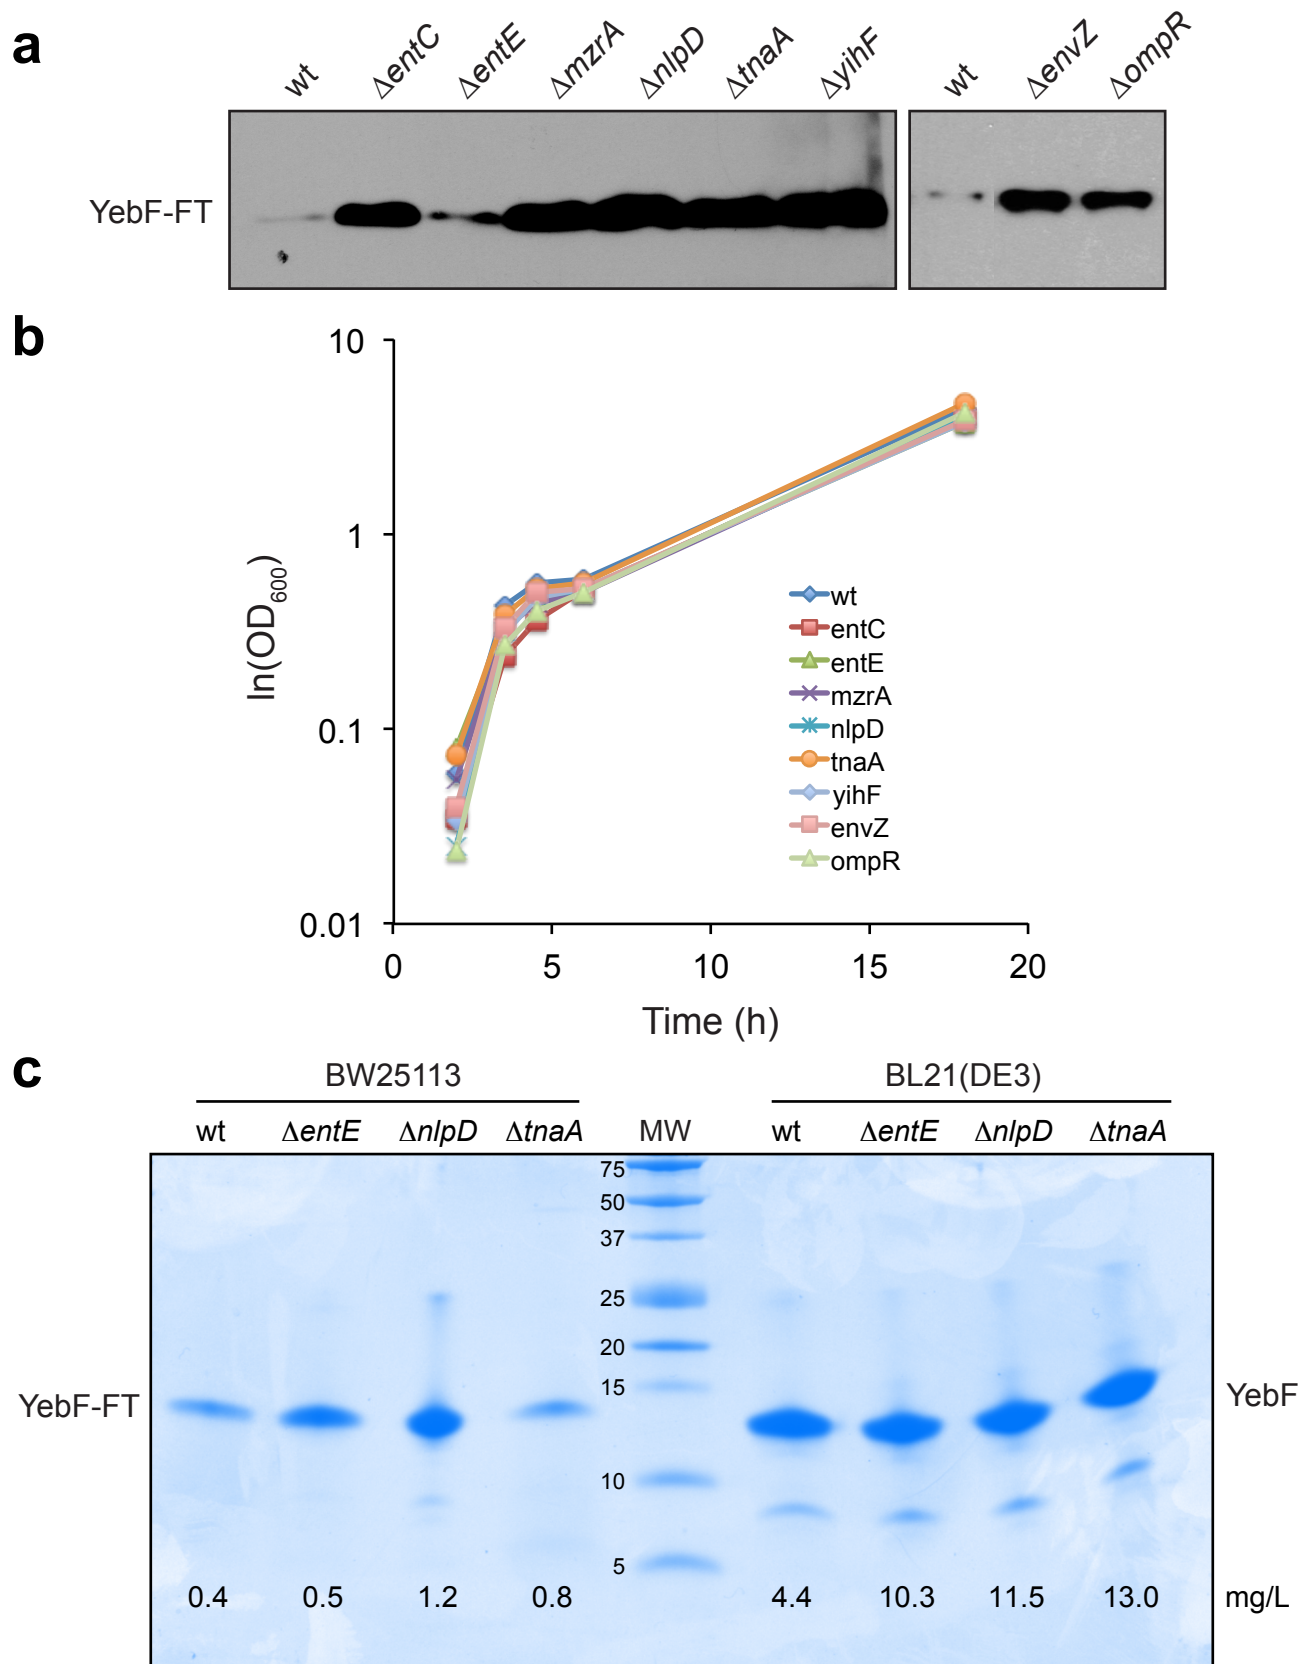

**Supplemental Figure S1. Expression and purification of YebF.** (a) Western blot analysis of cell-free supernatant fractions from wt BW25113 cells or mutant strains expressing YebF-FT. Blot was probed using anti-His antibodies. (b) Growth curves of the same strains in (a). Cells were grown aerobically at 37°C in liquid LB medium in shake flasks. (c) Purification of YebF from culture supernatants from various wt and knockout mutants of *E. coli* BW25113 and BL21(DE3) as indicated. SDS-PAGE analysis was performed using 5  $\mu$ g of each purified protein followed by staining with Coomassie stain. Total protein was determined following IMAC purification using a BCA protein assay kit. Titer of YebF in mg of protein per L supernatant are indicated for each case.

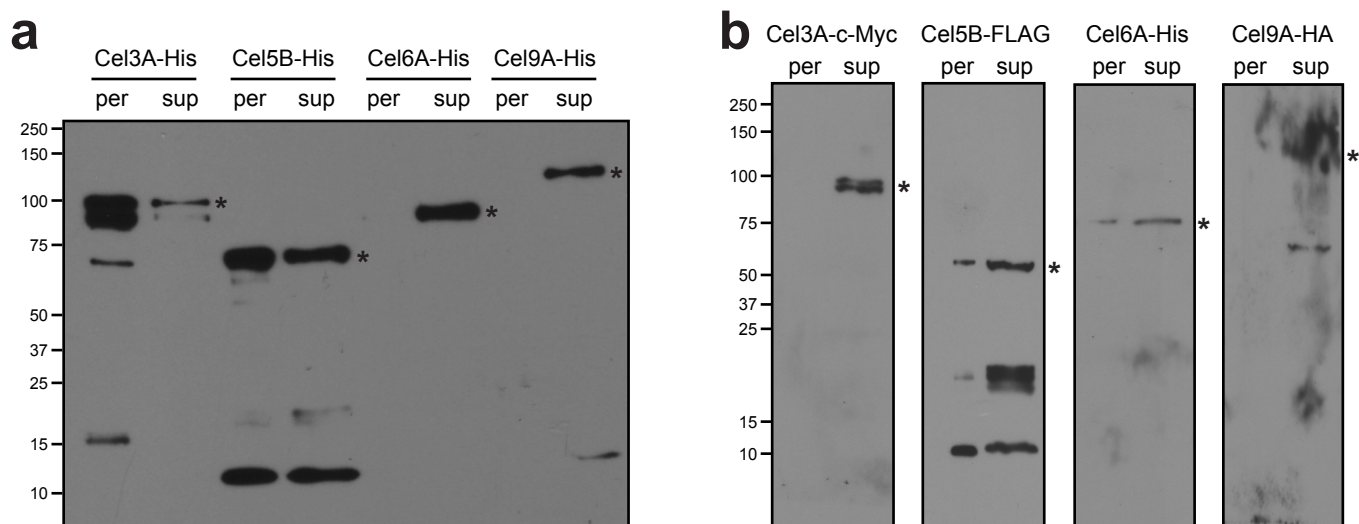

**Supplemental Figure S2. Extracellular secretion of cellulases fused to YebF.** (a) Western blot analysis of periplasmic (per) and supernatant (sup) fractions from wt BW25113 cells separately expressing YebF-Cel3A, YebF-Cel5B, YebF-Cel6A, and YebF-Cel9A. Proteins were detected using anti-His antibodies. (b) Western blot analysis of periplasmic (per) and supernatant (sup) fractions from wt BW25113 cells co-secreting all four YebF-cellulase fusion proteins. Blots were probed using (from left to right) anti-c-Myc, anti-FLAG, anti-His, and anti-HA antibodies. Asterisks denote the full-length target protein in each case.

**Supplemental Table S1. Characterization of outer membrane integrity and permeability**

| Assay                              | wt | $\Delta entC$ | $\Delta entE$ | $\Delta envZ$ | $\Delta m zrA$ | $\Delta nlpD$ | $\Delta ompR$ | $\Delta tnaA$ | $\Delta yihF$ |
|------------------------------------|----|---------------|---------------|---------------|----------------|---------------|---------------|---------------|---------------|
| RNAseI leakage <sup>a</sup>        | -  | -             | -             | +             | -              | -             | ++            | -             | -             |
| Detergent sensitivity <sup>b</sup> | -  | +             | -             | ++            | -              | +             | ++            | -             | -             |
| MBP leakage <sup>c</sup>           | -  | -             | -             | ++            | +              | -             | +             | -             | -             |
| DsbA leakage <sup>c</sup>          | -  | -             | -             | ++            | +              | -             | +             | -             | -             |

a. - no clearing; + moderate clearing; ++ significant clearing

b. - resistant; + mildly sensitive; ++ sensitive

c. - none detectable; + low amount; ++ high amount

**Supplemental Table S2. Plasmids used in this study**

| Plasmid              | Description*                                                                                    | Source                   |
|----------------------|-------------------------------------------------------------------------------------------------|--------------------------|
| pTrc99A              | P <sub>trc</sub> promoter; ColE1 <i>ori</i> , Amp <sup>r</sup>                                  | (Amann et al., 1988)     |
| pBAD33               | P <sub>BAD</sub> promoter; ColE1 <i>ori</i> , Cm <sup>r</sup>                                   | (Guzman et al., 1995)    |
| pET-21a              | T7 promoter; pBR322 <i>ori</i> , Amp <sup>r</sup>                                               | Novagen                  |
| pTrc-YebF            | <i>yebF</i> cloned in pTrc99A                                                                   | This study               |
| pTrc-YebF-FT         | Tetracycline “FLAsH tag” (FT) with C-terminal 6x-His epitope cloned into pTrc-YebF              | This study               |
| pTrc-ΔspYebF-FT      | YebF-FT lacking 21-residue N-terminal Sec export signal in pTrc99A                              | This study               |
| pTrc-spTorA-ΔYebF-FT | YebF-FT modified with N-terminal TorA signal peptide in pTrc-ΔspYebF-FT                         | This study               |
| pET-21a-YebF         | <i>yebF</i> cloned in pET-21a with C-terminal 6x-His epitope                                    | This study               |
| pTrc-YebF-Cel3A      | <i>C. japonicus cel3A</i> gene from in pTrc-YebF with C-terminal 6x-His tag                     | This study               |
| pTrc-YebF-Cel5B      | <i>C. japonicus cel5B</i> gene in pTrc-YebF with C-terminal 6x-His tag                          | This study               |
| pTrc-YebF-Cel6A      | <i>C. japonicus cel6A</i> gene in pTrc-YebF with C-terminal 6x-His tag                          | This study               |
| pTrc-YebF-Cel9A      | <i>C. japonicus cel9A</i> gene in pTrc-YebF with C-terminal 6x-His tag                          | This study               |
| pYebF-CEL4           | Polycistronic expression of YebF-Cel6A-6x-His, YebF-Cel9A-HA, YebF-Cel5B-FLAG, YebF-Cel3B-c-Myc | This study               |
| pBAD33-EntC          | <i>entC</i> cloned into pBAD33                                                                  | This study               |
| pBAD33-EntE          | <i>entE</i> cloned into pBAD33                                                                  | This study               |
| pBAD33-EnvZ          | <i>envZ</i> cloned into pBAD33                                                                  | This study               |
| pBAD33-MzrA          | <i>mzrA</i> cloned into pBAD33                                                                  | This study               |
| pBAD33-NlpD          | <i>nlpD</i> cloned into pBAD33                                                                  | This study               |
| pBAD33-OmpR          | <i>ompR</i> cloned into pBAD33                                                                  | This study               |
| pBAD33-TnaA          | <i>tnaA</i> cloned into pBAD33                                                                  | This study               |
| pBAD33-YihF          | <i>yihF</i> cloned into pBAD33                                                                  | This study               |
| pTrc-OmpA-FT         | <i>ompA</i> with C-terminal FT and 6x-His in pTrc99A                                            | This study               |
| pTrc-OmpF-FT         | <i>ompF</i> with C-terminal FT and 6x-His in pTrc99A                                            |                          |
| pTrc-OsmY-FT         | <i>osmY</i> with C-terminal FT and 6x-His in pTrc99A                                            |                          |
| pTrc-ChiA-FT         | <i>chiA</i> with C-terminal FT and 6x-His in pTrc99A                                            |                          |
| pTrc-PelB-FT         | <i>D. dadantii pelB</i> gene with C-terminal FT and 6x-His in pTrc99A                           |                          |
| pTrc-AvrPto-FT       | <i>P. syringae avrPto</i> gene with C-terminal FT and 6x-His in pTrc99A                         | This study               |
| pCHAP4278            | Entire <i>gsp</i> locus in pACYC184                                                             | (Francetic et al., 2000) |

|          |                                                      |                    |
|----------|------------------------------------------------------|--------------------|
| pCPP2006 | Entire <i>D. dadantii</i> <i>out</i> locus in pCPP19 | (He et al., 1991)  |
| pCPP2156 | Entire <i>D. dadantii</i> <i>hrp</i> locus in pCPP19 | (Ham et al., 1998) |

---

\*genes are from *E. coli* unless indicated otherwise

## References

- Amann, E., et al., 1988. Tightly regulated tac promoter vectors useful for the expression of unfused and fused proteins in *Escherichia coli*. *Gene*. 69, 301-15.
- Francetic, O., et al., 2000. Expression of the endogenous type II secretion pathway in *Escherichia coli* leads to chitinase secretion. *EMBO J.* 19, 6697-703.
- Guzman, L. M., et al., 1995. Tight regulation, modulation, and high-level expression by vectors containing the arabinose P<sub>BAD</sub> promoter. *J Bacteriol.* 177, 4121-30.
- Ham, J. H., et al., 1998. A cloned *Erwinia chrysanthemi* Hrp (type III protein secretion) system functions in *Escherichia coli* to deliver *Pseudomonas syringae* Avr signals to plant cells and to secrete Avr proteins in culture. *Proc Natl Acad Sci U S A.* 95, 10206-11.
- He, S. Y., et al., 1991. Cloned *Erwinia chrysanthemi out* genes enable *Escherichia coli* to selectively secrete a diverse family of heterologous proteins to its milieu. *Proc Natl Acad Sci U S A.* 88, 1079-83.
